# Supplementary material
Source: PubMed Central journal article supplement (PMC2673248)

## SUPPLEMENTAL FIGURES

**SUPPLEMENTAL FIGURE 1. Partial alignment of the two catalytic domains from PpoA.** A. Partial alignment of heme peroxidase domain from PpoA with *G. graminis* 7,8-LDS (Q9UUS2.1), sheep PGHS-1 (P05979.2) and sheep PGHS-2 (P79208.1). The catalytic tyrosine as well as the proximal and distal histidines, which are conserved in the four sequences and have been identified before (54), are shaded black. Mutated amino acids are labeled with an arrow. B. Partial alignment of P450 domain from PpoA with known P450 enzymes [CYP450\_119 (1F4T:B), CYP450\_cin (1T2B:B), CYP450\_130 (2UUQ:A), CYP450\_nor (1JFB:A), CYP4503A4 (1TQN:A), CYP4502C9 (1R9O:A)] and predicted CYP450 domains from different putative fungal Ppo-like enzymes [*A. niger* 1 (XP\_001395220), *A. niger* 2 (XP\_001401954) *A. fumigatus* 1 (EDP50447), *A. fumigatus* 2 (ABV21632.1), *A. fumigatus* 3 (EDP47075.1), *F. graminearum* 1 (FGSG\_02668)<sup>A</sup>, *F. graminearum* 2 (FGSG\_10960)<sup>A</sup>, *F. oxysporum* 1 (FOXG\_12909)<sup>A</sup>]. Amino acids matching the P450 consensus sequence according to the PROSITE database (<http://www.expasy.org/cgi-bin/nicedoc.pl?PDOC00081>) are shaded grey. Additionally, the cysteine responsible for the ligation of heme iron is shaded black. The mutated histidine and cysteine are labeled with an arrow. The alignment was carried out using CLUSTALW.

<sup>A</sup>Annotation code in accordance to the *Fusarium* database: ([http://www.broad.mit.edu/annotation/genome/fusarium\\_graminearum/](http://www.broad.mit.edu/annotation/genome/fusarium_graminearum/))

**SUPPLEMENTAL FIGURE 2. Mass spectrometric analysis of products formed by PpoA from 18:2<sup>A9Z,12Z</sup>.** A) Electron impact mass spectrum of the Me<sub>3</sub>Si ether methyl ester derivative of product 2 (5,8-DiHODE). B) Electron impact mass spectrum of the Me<sub>3</sub>Si ether methyl ester derivative of product 1.

**SUPPLEMENTAL FIGURE 3. Kinetic analysis of PpoA.** A) Michaelis Menten plot, the initial reaction rate of O<sub>2</sub>-consumption for the reaction of 15 µg PpoA with different linoleic acid concentrations is plotted in dependence of the substrate concentration. Reactions were performed in 50 mM phosphate buffer (pH = 7.2). B) The method of Hanes and Woolf was used for the linearization of the Michaelis Menten plot. Kinetic parameters were obtained using this method.

**SUPPLEMENTAL FIGURE 4. Peroxidase activity assay.** 15 µg PpoA were incubated with 100 µM 18:2<sup>A9Z,12Z</sup> and 100 µM N,N,N',N'-tetramethyl-p-phenylenediamine (TMPD) in 50 mM HEPES pH = 7.4 and the increase of the absorbance at 611 nm (due to oxidized TMPD) was recorded.

**SUPPLEMENTAL FIGURE 5. Kinetic analysis of PpoA\_H1004A.** A) Michaelis Menten plot, the initial reaction rate of O<sub>2</sub>-consumption for the reaction of 15 µg PpoA\_H1004A with different linoleic acid concentrations is plotted in dependence of the substrate concentration. Reactions were performed in 50 mM phosphate buffer (pH = 7.2). B) The method of Hanes and Woolf was used for the linearization of the Michaelis Menten plot. Kinetic parameters were obtained using this method.



CYP450\_2C9

VYGPVFTLYFGLKPIVVLHGVEAVKEALIDLG--EEFSGRGI FPLAERANRFGIVFSNGK

**A.nidulans\_PpoA**

*A.niger* 1  
*A.niger* 2  
*A.fumigatus* 1  
*A.fumigatus* 2  
*A.fumigatus* 3  
*F.graminearum* 1  
*F.graminearum* 2  
*F.oxysporum* 1  
CYP450\_119  
CYP450\_cin  
CYP450\_130  
CYP450\_nor  
CYP450\_3A4  
CYP450\_2C9

**LHKNSYKLAG-VNQVD--IVRDVANLAQVHFCSSVFS-LPLKTDSNPRGIFAESELYKIM 791**

LELNALQLSKDLNQVD--IIRDVAIPLNARIMADLFC-LDMKTPENESGSMNAATVYKHL  
LRQHSYQLGG-VNQVD--IVRDVANYAQVHFCANVFS-LPLKTESNPRGIFAESELYEIL  
LHRYSYKLAG-VNQVD--VVRDIANLAQVHFCASVFS-LPLKTESNPRGIFTESELYQIM  
LTEKSCRIGN-VNQVD--ISRDVGNLAHVHFCANVFS-LPLKSREHPHGIITAHMFEM  
LTEKSCRIGN-VNQVD--ISRDVGNLAHVHFCANVFS-LPLKSREHPHGIITAHMFEM  
-----DQID--IIRDVAIPLNAQLLSDMFY-FDMRTDENPDGELGAAELYRSL  
LNEKSYTLAG-KKQVD--VVRDVGNVAHTHFVARMFN-LPLKTKQNPKGVFSEQELYMIL  
LAEKSYRLAG-KMQVD--VVRDVGNVAHTHFVARMFN-LPLKTSNPKGVFSEQELYMIL  
LHDELRSMSADIFSPQ--KLQTLTFIRETTLSLLDS-IDPREDD-----IVKKLAVPL  
VHKYRQLVAKPFSPE--ATDLTFEQLRQSTNDLIDARIELGEGD-----AATWLANEI  
VHTEFRKLVSRGFTPR--QVETVEPTVRKFVVERLEKLRANGGGD-----IVTELFKPL  
EHMHQSRMVEPTFTPE--AVKNLQPYIQRVDDLLEQMKQKGCANGP--VDLVKEFALPV  
EWRRLRLLSPTFTSG--KLEKMPVPIAQYGDVLRN--LRRAETGKPVTLKDVFGAYS  
KWKEIRRFSLMTRLNRFNGMKRSIEDRVQEEARCLVEELRKTAKSPCDPTFLGCAPCNVI

**A.nidulans\_PpoA**

*A.niger* 1  
*A.niger* 2  
*A.fumigatus* 1  
*A.fumigatus* 2  
*A.fumigatus* 3  
*F.graminearum* 1  
*F.graminearum* 2  
*F.oxysporum* 1  
CYP450\_119  
CYP450\_cin  
CYP450\_130  
CYP450\_nor  
CYP450\_3A4  
CYP450\_2C9

**AAVFTAIFYDADIGKSFELNQAARTVTQQLG----QLTMANVEIIA----- 833**

MNVRTWGFNNTDPGLMLQRRKWASESAELV----KTTLVVNEQAQPQK-----  
ALVFASIFYDADVGTSTFQLNQARTARDVTQQLG----ELTMANVDFVN-----  
AVVFTSIFYDADIGKSFELNQAARAVTQQLG----QLTLANVELIA-----  
AVIFTAIFFDAPVKSFLRHKAREAAANKLG----RLVELNVKAIK-----  
AVIFTAIFFDAPVKSFLRHKAREAAANKLG----RLVELNVKAIK-----  
LDIRVWGVNNDPQAWNRRRAQEGVKRIY----DSTKLLVSEVEVARPRG-----  
AVIFVCIFFDIDPAKSFPLRQAAREVAQQLG----KIVEMNVKLAT-----  
AVIFVCIFFDIDPAKSFPLRQAAREVAQQLG----KIVEMNVKLAN-----  
PIIVISKILGLPIEDKEKFKWSDLVAFRLG----KPEGIFELGKK-----  
PARLTAIILGLPEEDGDTYRRWVAITHVENP--EEGAEIFAELVAH-----  
PSMVVAHYLGVPEEDWTQFDGWTQAIVAANAV--DGATTGALDAVG-----  
PSYIYTLGLGVFNLDLEYLTQQAIRTNSSST--AREASAANQELLD-----  
MDVITSTSFVGNIDSLNPNQDPFVENTKLLR--FDFLDPFFLSITVFPFLIPILEVLNI  
CSIIFHKRFDYKQQFLNLMKELNENIKILSSPWIQICNNFSPIIDYFPGTHN-----KL

**A.nidulans\_PpoA**

*A.niger* 1  
*A.niger* 2  
*A.fumigatus* 1  
*A.fumigatus* 2  
*A.fumigatus* 3  
*F.graminearum* 1  
*F.graminearum* 2  
*F.oxysporum* 1  
CYP450\_119  
CYP450\_cin  
CYP450\_130  
CYP450\_nor  
CYP450\_3A4  
CYP450\_2C9

**-----KTGLIANLVNRLHR-RDVLSEYGIHMIQRLLS-----GLPATEIIVWT 875**

-----TRMLGKLTGYQQSEVSTLRWYGNVVKQMMEM-----DMTAAGTAEV  
-----KAGFIANLVSSLHR-HDVLSEYGEHMIQRLLS-----NVPPAEIIVWT  
-----KTGFIANLVNLSLR-HDVLSEYGVHMIQRLLS-----GMPAPEIIVWT  
-----SSGLIATLLGNMPANRNALFEYGVHMVERLLQS-----GLDPEQVTSW  
-----SSGLIATLLGNMPANRNALFEYGVHMVERLLQS-----GLDPEQVTSW  
-----IGLISAVSNRIGAKSYLKKDSLRSCLGLKLVLELLAQ-----GSSIDHVTDN  
-----SVGIGLFTSKPNKNDPLAAYGENMAKGLKKA-----GLSIDDIVWS  
-----SIGVKGLFTSKPDKNDPLARAYGENMAKGLKKA-----GLSTEDIVWS  
-----YLELIGYVKDHLNS-----GTEVVSrvvns-----NLSDIEKLG  
-----ARTLIAERRTNPN-----DIMSRVMSKIDG-----SLSEDDLIGF  
-----SMMAYFTGLIERRRTEPADDAISHLVAAGVGADGD-----TAGTLSILAF  
-----YLAIIIVEQLRVEPKD--DIISKLCTEQVKPG-----NIDKSDAVQI  
CVFPREVTNFLRKSVMKESRLEDTKHRVDFLQMLIDSQNSKETESHKALSDELVAQ  
LKNVAFMKSYILEKVEKHEQESMDMNNPQDFIDCFLMKMEKEKHNPQS---EFTIESLENT

**A.nidulans\_PpoA**

*A.niger* 1  
*A.niger* 2  
*A.fumigatus* 1  
*A.fumigatus* 2  
*A.fumigatus* 3  
*F.graminearum* 1  
*F.graminearum* 2  
*F.oxysporum* 1  
CYP450\_119  
CYP450\_cin  
CYP450\_130  
CYP450\_nor  
CYP450\_3A4  
CYP450\_2C9

**HILPTAGGMVANQAQLFSQCLDYLLSEEGSGHLPEINRLAKENT-----PEADELLTR 928**

CWLTAVGGVG-APVGLIADVLQYLRPENIDHWKRIQNLVSDPNS-----GSIDKLLRQ  
HLLPTAGGMVANQAQLFSQCLDYLLSDEGSIHLPDIKRLAKENT-----SEADALLR  
HVLPTAGGMVANQAQLFSQCLDYLLSDEGSIHLPDIKRLAKEDT-----TEADLLLR  
QVLPTAVAMVNPQAQVFTQIIDYLLSDKGRKHLDPDKRFKEDS-----PASDEVLLR  
QVLPTAVAMVNPQAQVFTQIIDYLLSDKGRKHLDPDKRFKEDS-----PASDEVLLR  
LWLTAFGGIG-VPVTAIFYEVLAFLRPNENASIAEVAQIAQKGD-----DATLHA  
QILPTAGAMVNPQAQVFAQTLDWYLSPAGEKYRPELHRIAALTEG-----DETDAALLG  
QILPTAGAMVNPQAQVFAQTLDWYLSPAGEKYRPELHRIAALTEG-----DETDAALLG  
IILLIAGNETTTLNLSNSVIDFTRFN---LWQRIR-----EENLYLK  
FTIILLGGIDNTARFLSSVFWRLAWDIELRRRLIAHP-----ELIPN  
TFTMVTGGNDVTGMLGGSMPLLHRRPDQRRLLDDP-----EGIPD  
AFLLLVAGNATMVNMIALGVATLAQHPDQLAQLKANP-----SLAPQ  
SIIIFAGYETTSSVLSFIMYELATHPDVQQLQEEIDAVLPNKAPPTVDTVLQMEYLDL  
AVDLFGAGTETTSTTLRYALLLLKHPVETAKVQEEIERVIGRNRSPCMQDRSHMPYDTA

**A.nidulans\_PpoA**

*A.niger* 1  
*A.niger* 2  
*A.fumigatus* 1  
*A.fumigatus* 2  
*A.fumigatus* 3  
*F.graminearum* 1

**YFMEGARLRS--SVALPRVAAQPTVVE-DNGEKLTIKAGQVVMCNLVSACMDPTAF--PD 983**

YVLEAQRLLTS--MECTVRVCKAHTRTIN----DQEFKPGDVVITLLGPACRDPTSII--PD  
YFMEGARLRS--SVGLPRLVAKPTVVD-DGGSKYTLKPGQSVLNLVSAASMDPRSF--PE  
YFMEGARIRS--SVALPRVAAQPTVVE-DNGQKITLKGQGHIIICNLVSAASMDPVTF--PE  
YCMIAIRLNG--IFGSYRSQ--TNLTLDDKGGKVIKAGDNVFSFIDANRDPDVF--PK  
YCMIAIRLNG--IFGSYRSQ--TNLTLDDKGGKVIKAGDNVFSFIDANRDPDVF--PK  
YVAEALRMTS--SQNRVIRSKTPGEVD-----GQSIAPGTAVVLMLEAGRNPKI--PD

```

F.graminearum 2 YAMEGIRMAG--TFGLYREATTADVIQEDDGREVPVKAGDRVFSVFTAADKPNIF--PD
F.oxysporum 1 YAMEGIRMAG--TFGLYREATGPDTHEDDGRSIPVNAGDRVFSVFTAADKPNIF--PN
CYP450_119 AIEEALRYSP-VMRTVRKTKERVKLG-----DQTIIEGEYVRVWIASANRDEEVF--HD
CYP450_cin AVDELLRFYG--PAMVGRVLTQEVTVG-----DITMKGQTAMLWFPPIASRDRSAF--DS
CYP450_130 AVEELLRLTSP-VQGLARTTTTRDVTIG-----DTTIPAGRRVLLLYGSANRDERQYG-PD
CYP450_nor FVEELCRYHTASALAIKRTAKEDVMIG-----DKLVRANEGIIASNQSANRDEEVFENPD
CYP450_3A4 VVNETLRLFP-IAMRLERVCKKDVVEIN-----GMFIPKGVVVMIPSYALHRDPKYW--TE
CYP450_2C9 VVHEVQRYIDLLEPSTLPHAVTCDIKFR-----NYLIPKGTITLISLTSVLHDNKEF--PN
* * : . . : .
      ▼ ▼
A.nidulans_PpoA PEKVKLDRDMNL-----YAHFGFGPHKCLGLDLCKTGLSTMLKVLGR-LDNLRRAP 1033
A.niger 1 AETFKLDRPSNA-----YIHFGYGAHECLGKEIGLTFVAVSMLRVLAG-LKYLRPAP
A.niger 2 PEKVKLDRDMSL-----YAHFGFGPHQCLGMGICKLALTMLRVVGR-LDNLRRAP
A.fumigatus 1 PDKVKLDRDMNL-----YAHFGFGPHQCLGLGLCKTALTMLKVIGR-LDNLRRAP
A.fumigatus 2 PEEVDLNRPMES-----YIHYGVGPHTCLGSEASKVALTMLRVVGR-LDNLRRAP
A.fumigatus 3 PEEVDLNRPMES-----YIHYGVGPHTCLGSEASKVALTAMLRVGR-LDNLRRAP
F.graminearum 1 ADKFNAQRKQOE-----VSASFYQHECVAKDVALAFVTGLIKLVAD-LKELRPAP
F.graminearum 2 PEVVDPKRRPLDS-----YIHYGVGPHACLGRDISQVALTELFRALFR-KKGLRRVA
F.oxysporum 1 PGVVDPKRRPLDK-----YIHYGVGPHACLGRDISQVALTELFRAVFR-KKGVRRVP
CYP450_119 GEKFIPDRNPNP-----HLSFGSGIHLCLGAPLARLEARIAIEEFKFRFRHIEILD
CYP450_cin PDNIVIERTPNR-----HLSLGHGIHRCLGAHLIRVEARVAITEFLKRIPEFSLDP
CYP450_130 AAELDVTRCPRN-----ILTFSHGAHCLGAAAARMQCRVALTELLARCPDFEVAE
CYP450_nor EFNMRKWPQQD-----PLGFGFGDHRCTAEHLAKAELTVFSTLYQKFPDLKVAV
CYP450_3A4 PEKFLPERFSKKNKDNIDPIYITPFGSGPRNCLGMRFALMNMKLALIRVLQNFSPKPKCE
CYP450_2C9 PEMFDPHHFLDEGGNFKSKYFMPFSAGKRICVGEALAGMELFLFLTSILQNFNLKSLVD
. * : * : . : .
      * : * : . : .
A.nidulans_PpoA GAQGQLKKLSGPGGIAYMNEQSGFTFPSTMKIQWD-----GELPQL 1077
A.niger 1 GDMGMLKSII-VGRRVYLNDSWSWMTDRPTNGGIGMSTQYSFGQHHHHQYHEITRTSSS
A.niger 2 GSQGQLKKIAGPGGISMYMTADQSSYWPFPSTMKIQWD-----GDLPSL
A.fumigatus 1 GGQGLKKLSGPGGIAMYPDQTAFFFPPTMKIQWD-----GDLPEV
A.fumigatus 2 GAQGELKKIPREHGFFTYMREDQSSFYFPMSWKLHYD-----GEIPGK
A.fumigatus 3 GAQGELKKIPREHGFFTYMREDQSSFYFPMSWKLHYD-----GEIPGK
F.graminearum 1 GQMGTVKTIIR-VGTEKAYLNDSWSYLGFDASTWVHFN-----GHGKGNFEGDRVPTS
F.graminearum 2 GAQGELKKVPRPGGFFVYMTEDWGSIWFPPTSMKVTWD-----E-----
F.oxysporum 1 GAQGELKKVPRPGGFFVYMTEDWGSIWFPPTSMKITWD-----E-----
CYP450_119 TEKVPNEVLNGYKRLVVRKLSNE-----
CYP450_cin NKECEWLMGQVAGMLHVP IIFPKGKRLSE-----
CYP450_130 SRIVWSGGSYVRRPLSVFRTSSR-----
CYP450_nor PLGKINYTPLNRDVGIVDLPVIF-----
CYP450_3A4 TQIPLKLSLGLLQPEKPVVLKVESRDGTVSGAHHHH-----
CYP450_2C9 PRNLDTPVVNGFASVPPFYQLCFIPIHHHH-----
      .
A.nidulans_PpoA KEDE----- 1081
A.niger 1 SLPSMLGDDES YGRFSGTLN-
A.niger 2 ATN-----
A.fumigatus 1 KE-----
A.fumigatus 2 EQPVRGDFVCNVP GHWQN---
A.fumigatus 3 EQPVRGDFVCNVP GHWQN---
F.graminearum 1 NTP IQEYYSLLQKRKDELLRR
F.graminearum 2 -----
F.oxysporum 1 -----
CYP450_119 -----
CYP450_cin -----
CYP450_130 -----
CYP450_nor -----
CYP450_3A4 -----
CYP450_2C9 -----

```

Supplemental Figure 2

A

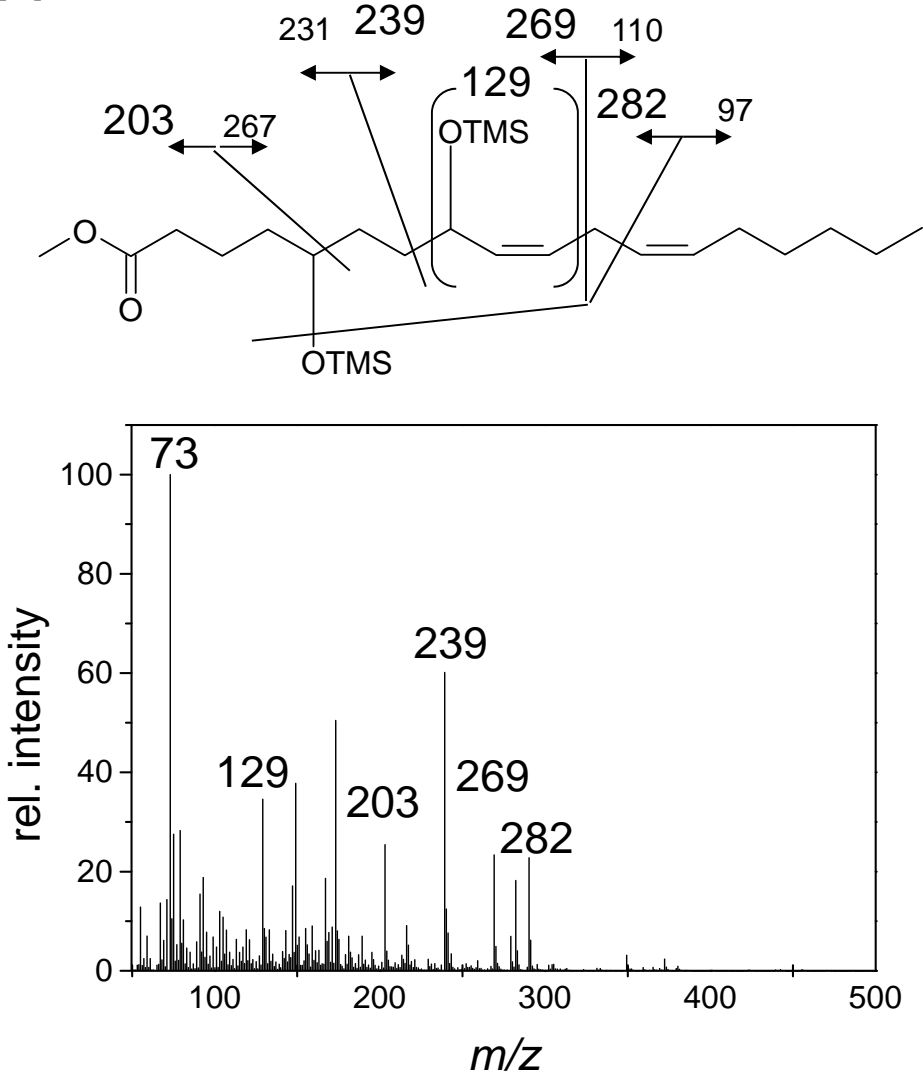

**B**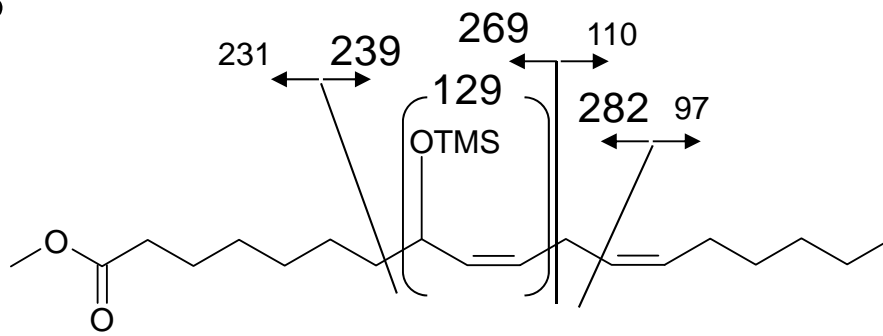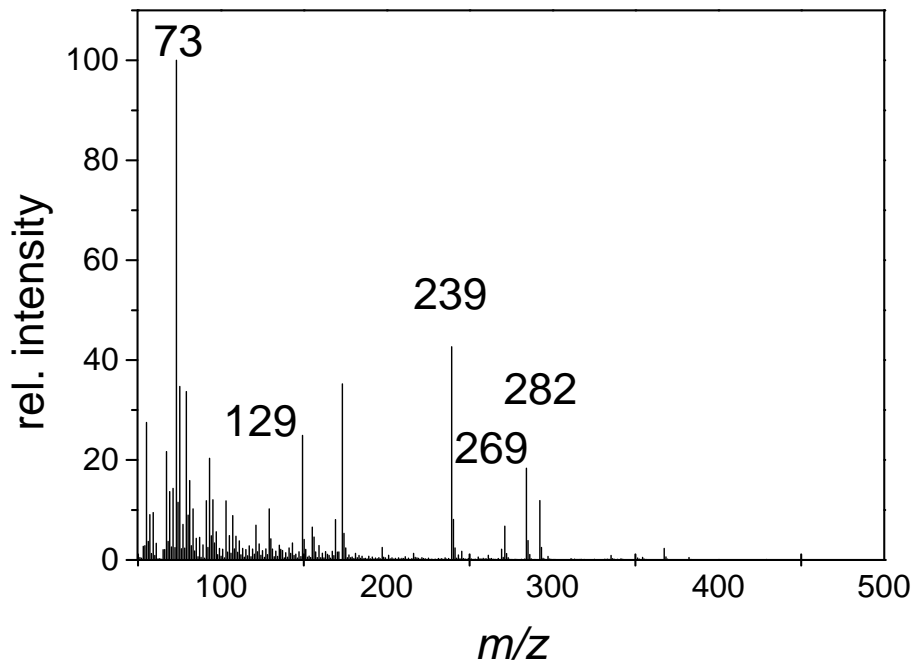

Supplemental Figure 3

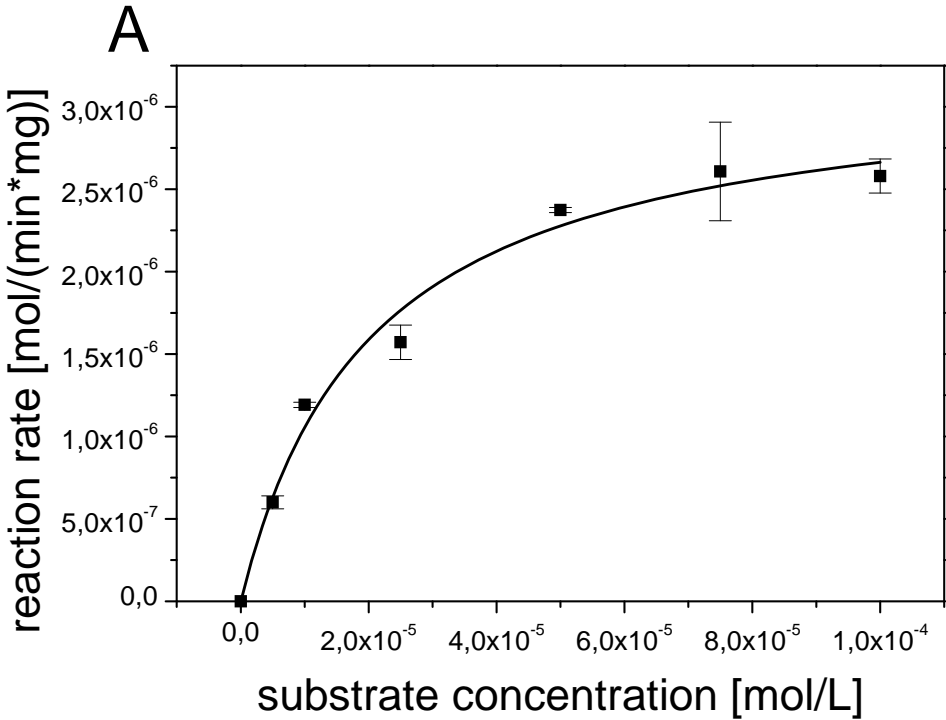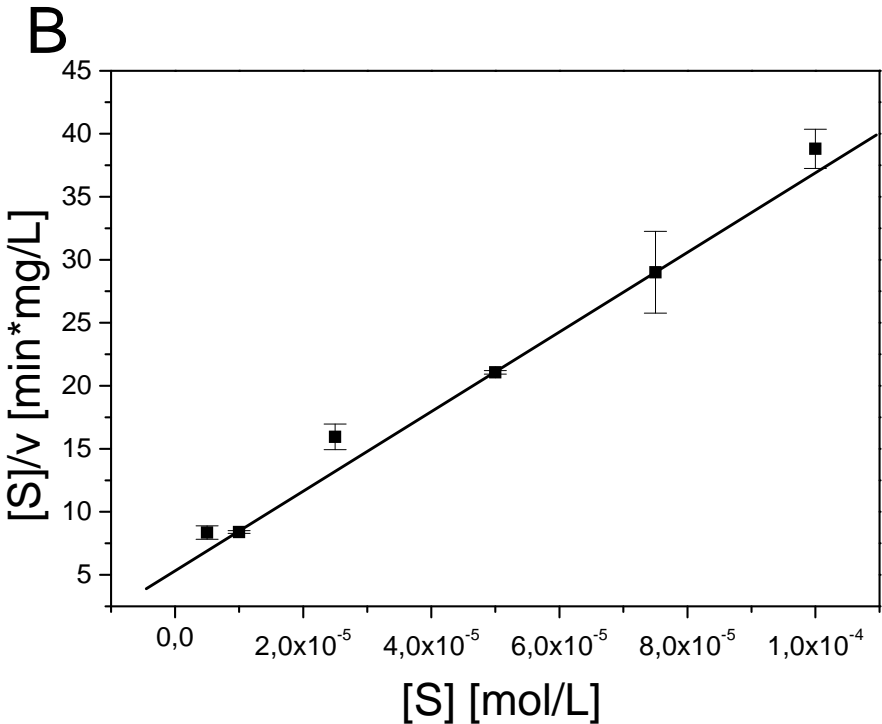

Supplemental Figure 4

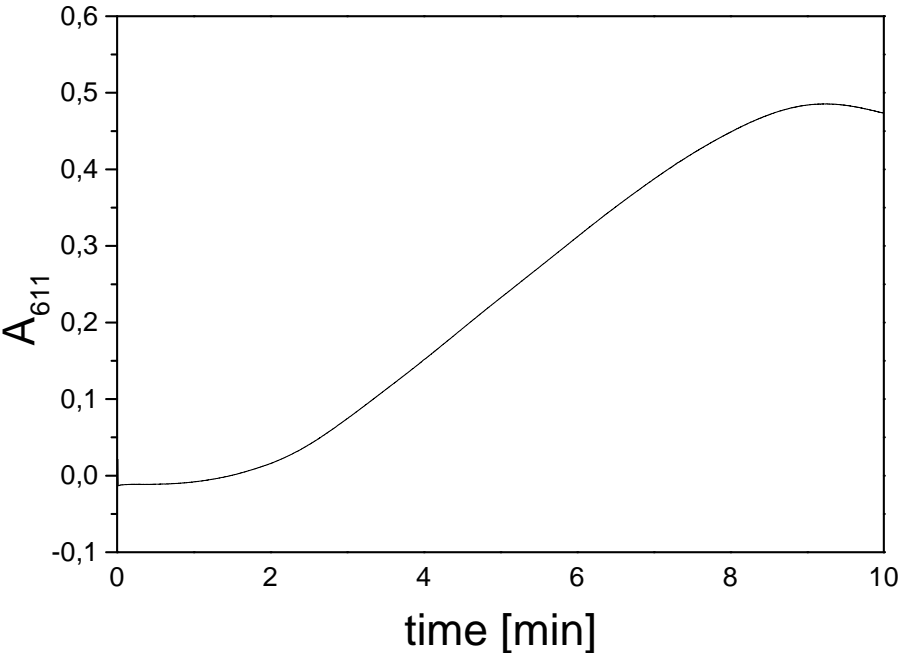



Supplemental Figure 5

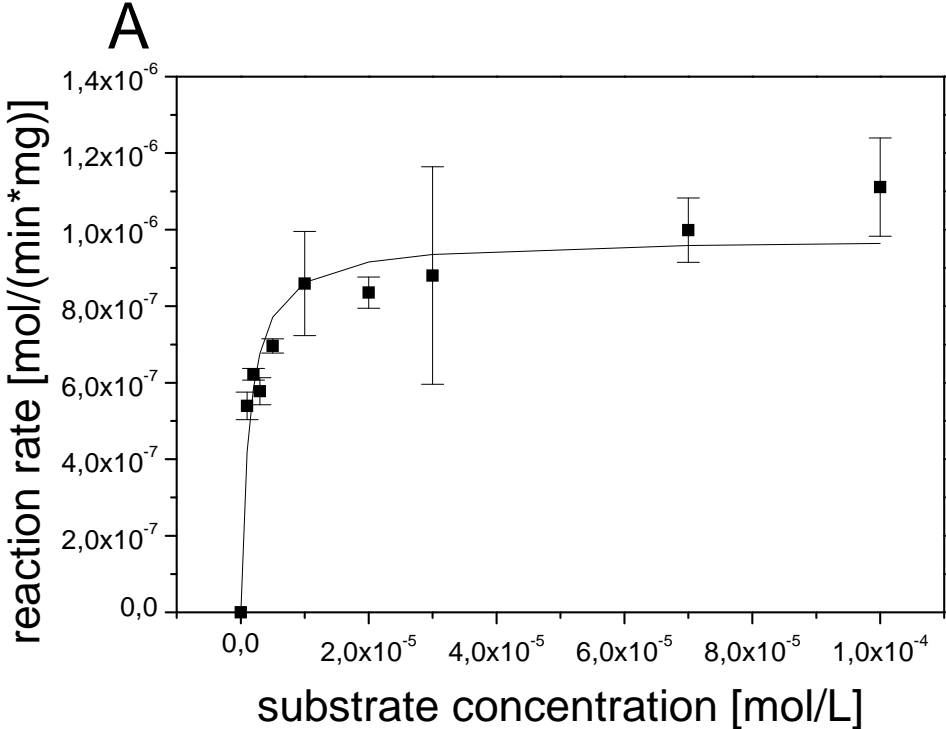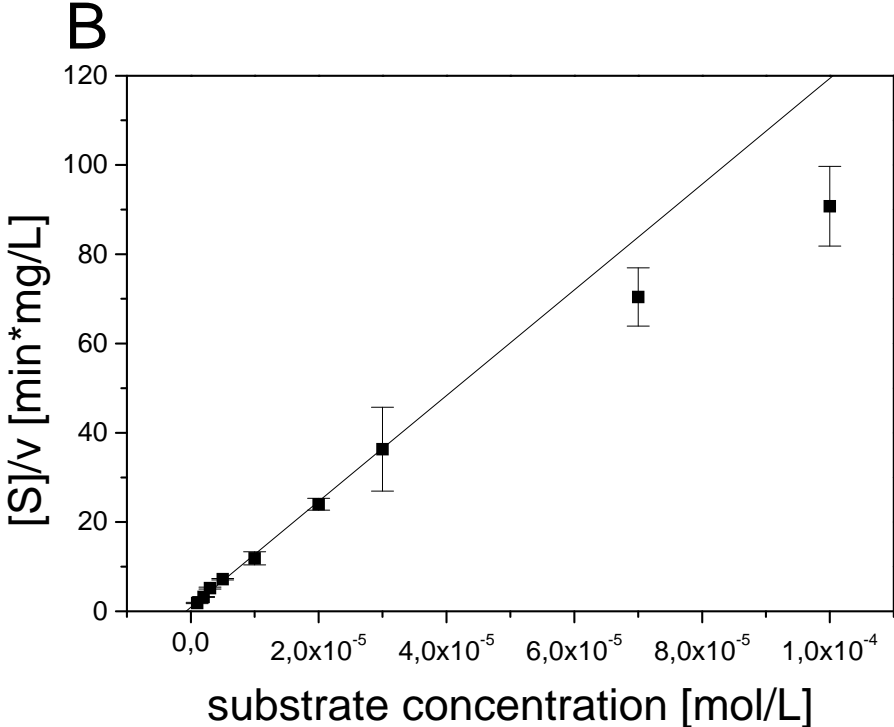

Supplement: M809152200_1.pdf [file M809152200_1.pdf]
